# Supplementary material
Source: PubMed Central journal article supplement (PMC4290796)
Supplement: Supp_Figure1.pdf [file Supp_Figure1.pdf]

## Supplementary Data

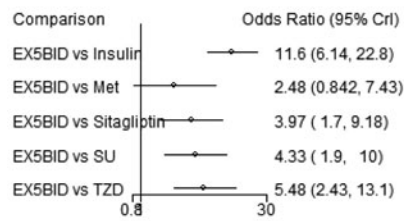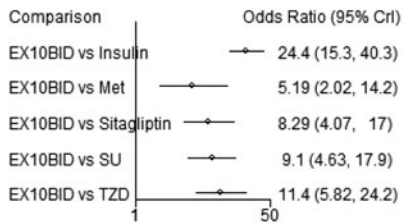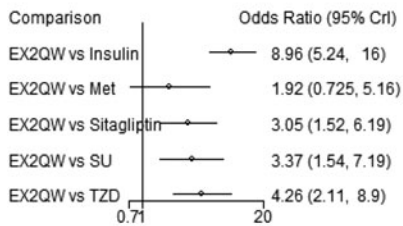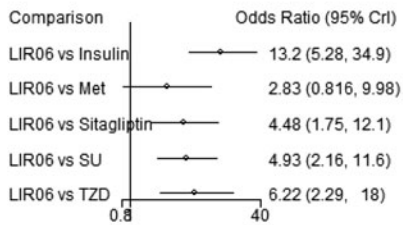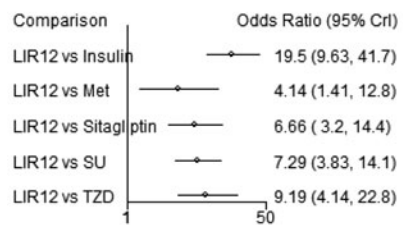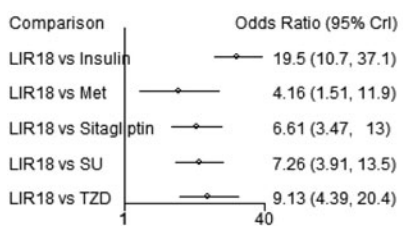

**A Nausea OR (95%CI)**

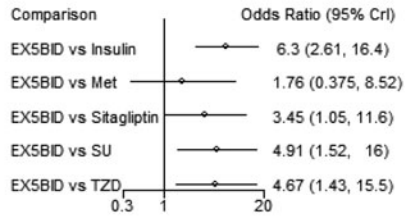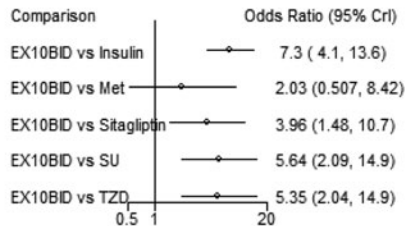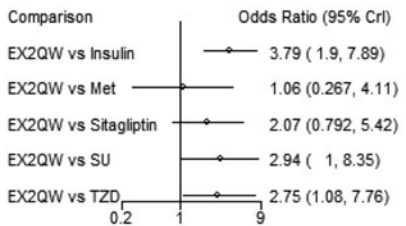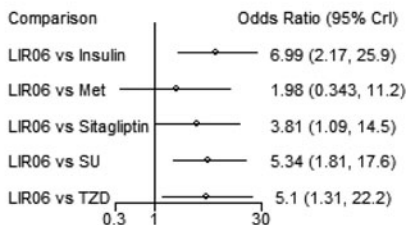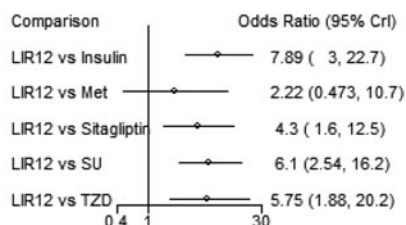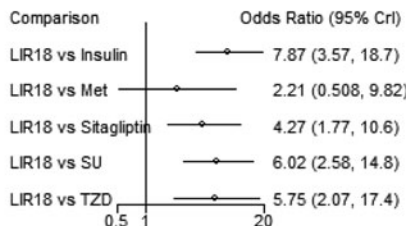

**B Vomiting OR (95%CI)**

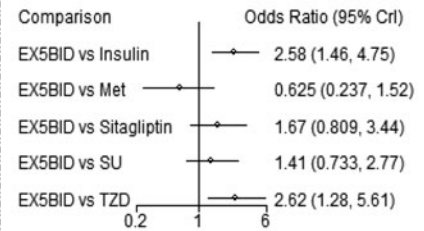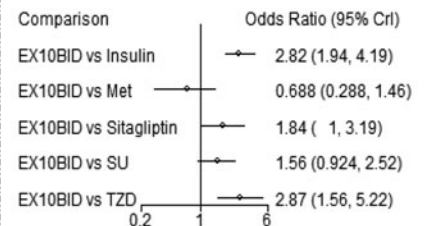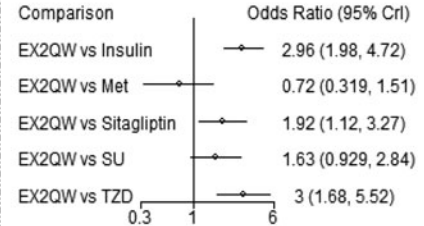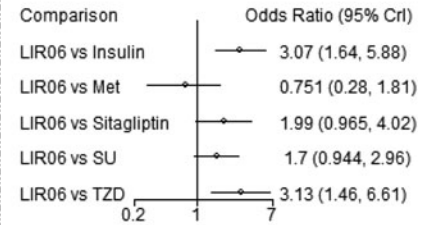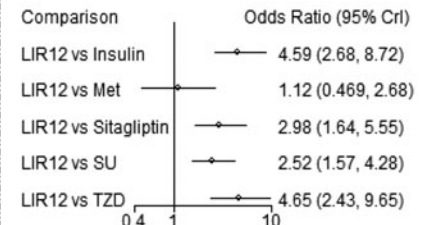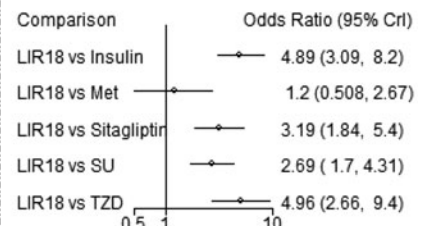

**C Diarrhea OR (95%CI)**

**SUPPLEMENTARY FIG. S1.** Results of estimated odds ratio (95% confidence interval [CI]) of exenatide and liraglutide on major gastrointestinal adverse events versus conventional treatments. EX10BID, exenatide 10  $\mu$ g twice daily; EX2QW, exenatide 2 mg once weekly; EX5BID, exenatide 5  $\mu$ g twice daily; LIR0.6QD, liraglutide 0.6 mg once daily; LIR1.2QD, liraglutide 1.2 mg once daily; LIR1.8QD, liraglutide 1.8 mg once daily; Met, metformin; SU, sulfonylureas; TZD, thiazolidinedione.
