# Supplementary material
Source: PubMed Central journal article supplement (PMC4290796)
Supplement: Supp_Figure3.pdf [file Supp_Figure3.pdf]

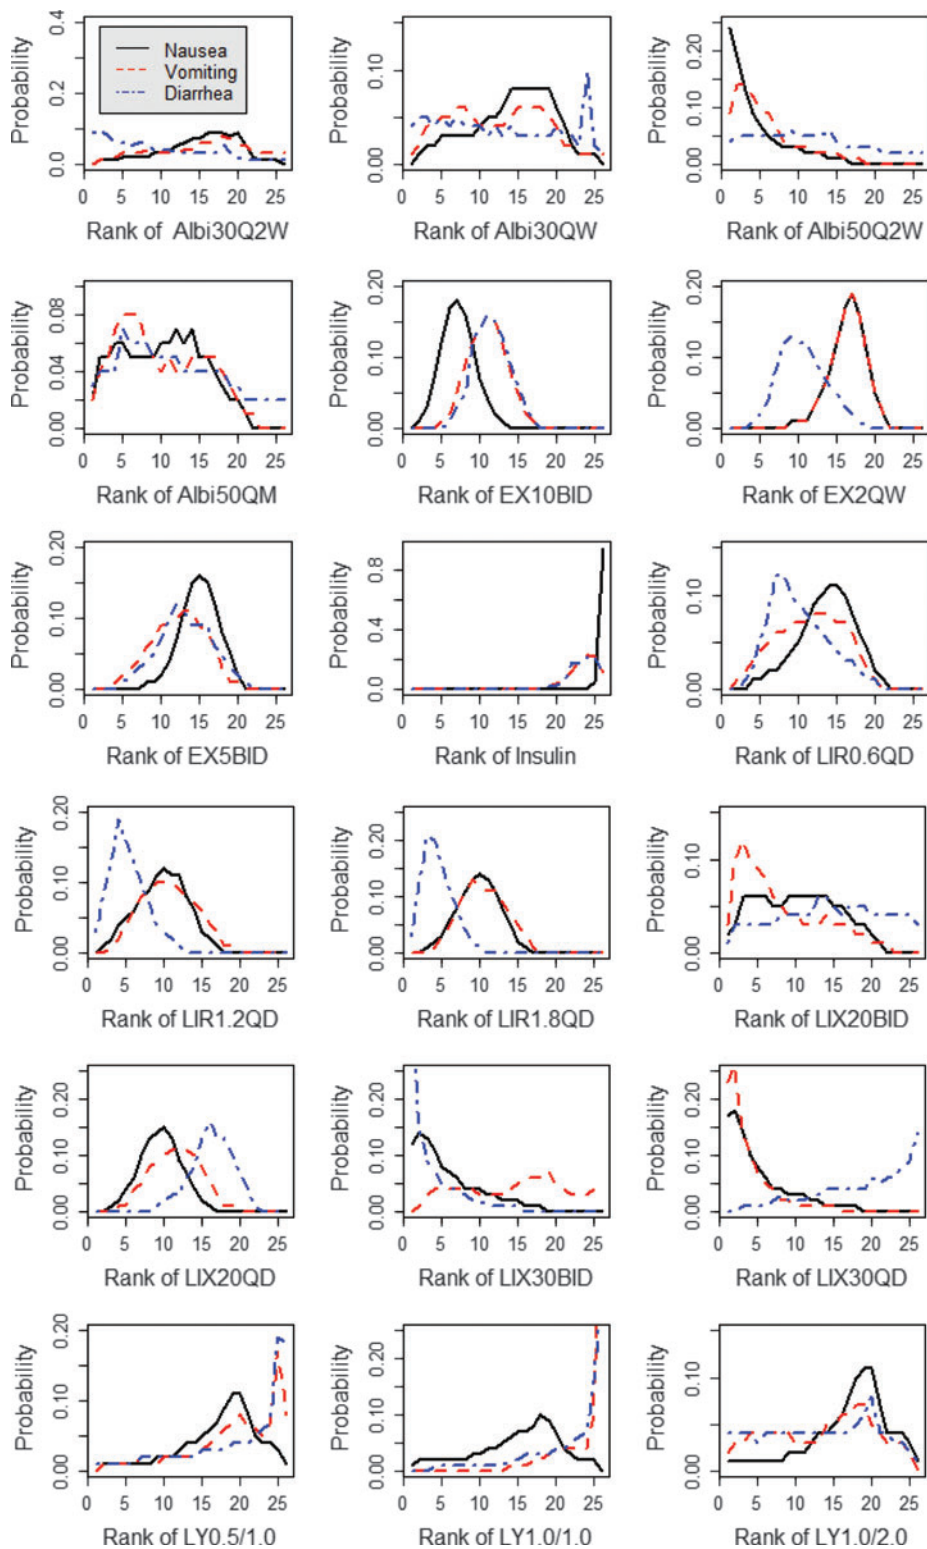

**SUPPLEMENTARY FIG. S3.** (Continued).

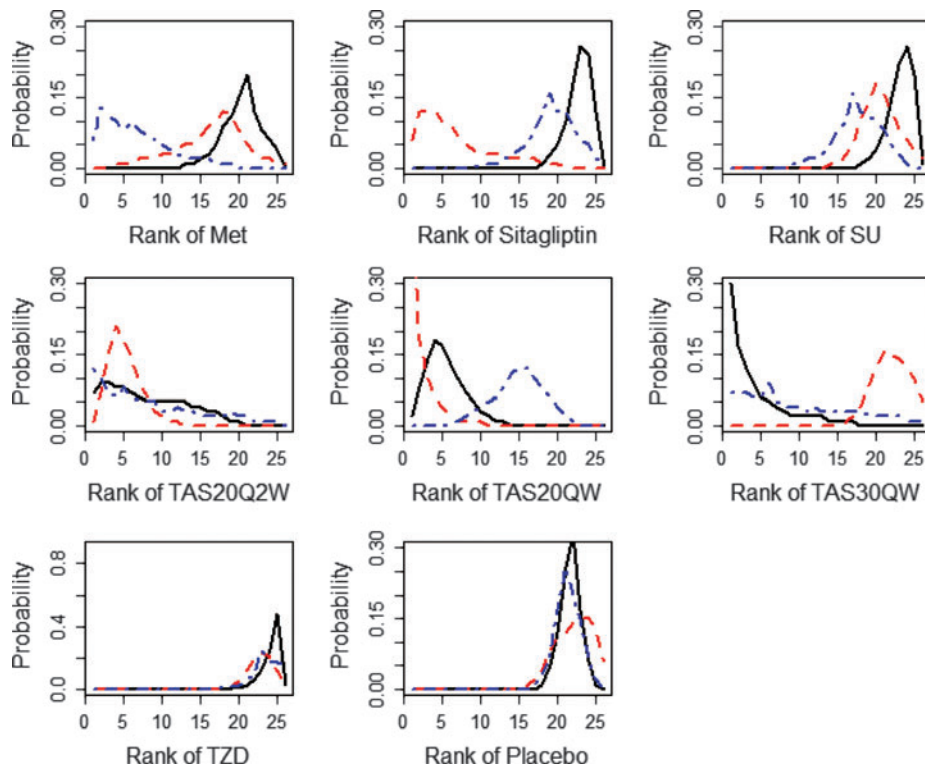

**SUPPLEMENTARY FIG. S3.** Random plot of different dose regimens of glucagon-like peptide-1 receptor agonists on gastrointestinal adverse events. Albi30Q2W, albiglutide 30 mg once biweekly; Albi30QW, albiglutide 30 mg once weekly; Albi50Q2W, albiglutide 50 mg once biweekly; Albi50QM, albiglutide 50 mg once monthly; EX10BID, exenatide 10  $\mu\text{g}$  twice daily; EX2QW, exenatide 2 mg once weekly; EX5BID, exenatide 5  $\mu\text{g}$  twice daily; LIR0.6QD, liraglutide 0.6 mg once daily; LIR1.2QD, liraglutide 1.2 mg once daily; LIR1.8QD, liraglutide 1.8 mg once daily; LIX20BID, lixisenatide 20  $\mu\text{g}$  twice daily; LIX20QD, lixisenatide 20  $\mu\text{g}$  once daily; LIX30BID, lixisenatide 30  $\mu\text{g}$  twice daily; LIX30QD, lixisenatide 30  $\mu\text{g}$  once daily; LY0.5/1.0, LY2189265 0.5 mg once weekly for 4 weeks, then 1.0 mg once weekly for 12 weeks; LY1.0/1.0, 1.0 mg once weekly for 16 weeks; LY1.0/2.0, 1.0 mg once weekly for 4 weeks, then 2.0 mg once weekly for 12 weeks; Met, metformin; SU, sulfonylureas; TAS20Q2W, taspoglutide 20 mg once biweekly; TAS20QW, taspoglutide 20 mg once weekly; TAS30QW, taspoglutide 30 mg once weekly; TZD, thiazolidinedione.
