# Supplementary material
Source: PubMed Central journal article supplement (PMC4290796)
Supplement: Supp_Figure5.pdf [file Supp_Figure5.pdf]

A

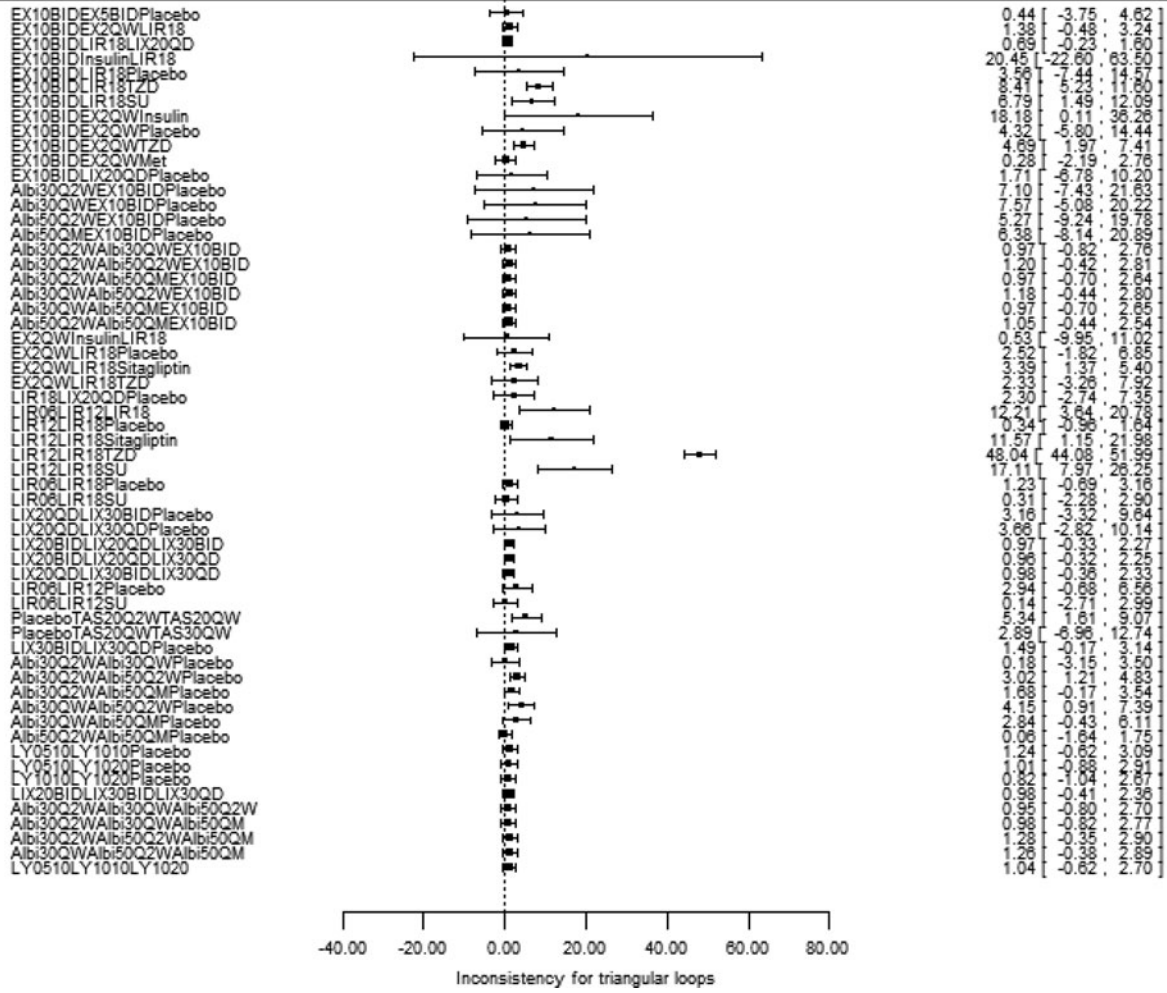

SUPPLEMENTARY FIG. S5. (Continued).

**B**

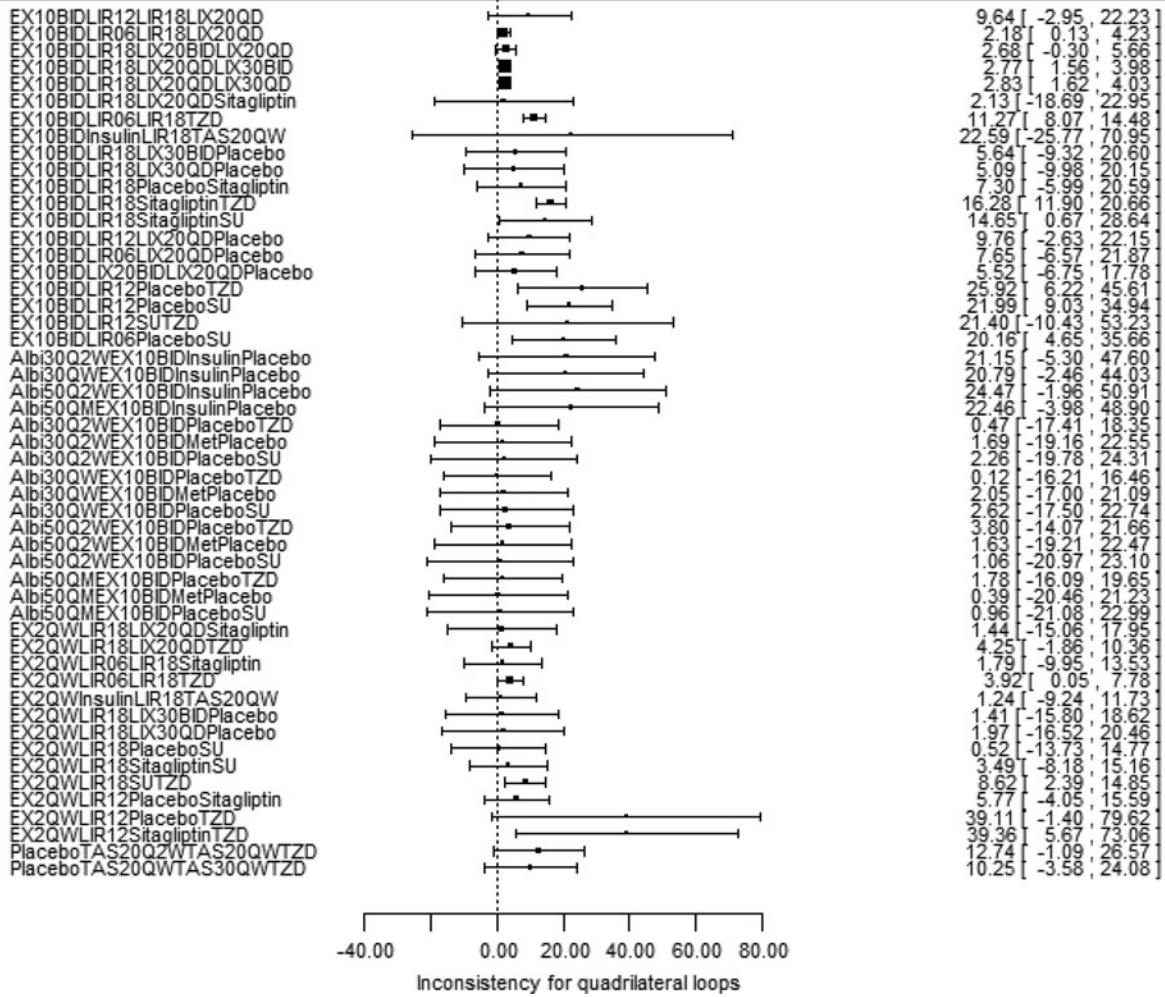

**SUPPLEMENTARY FIG. S5.** (Continued).

C

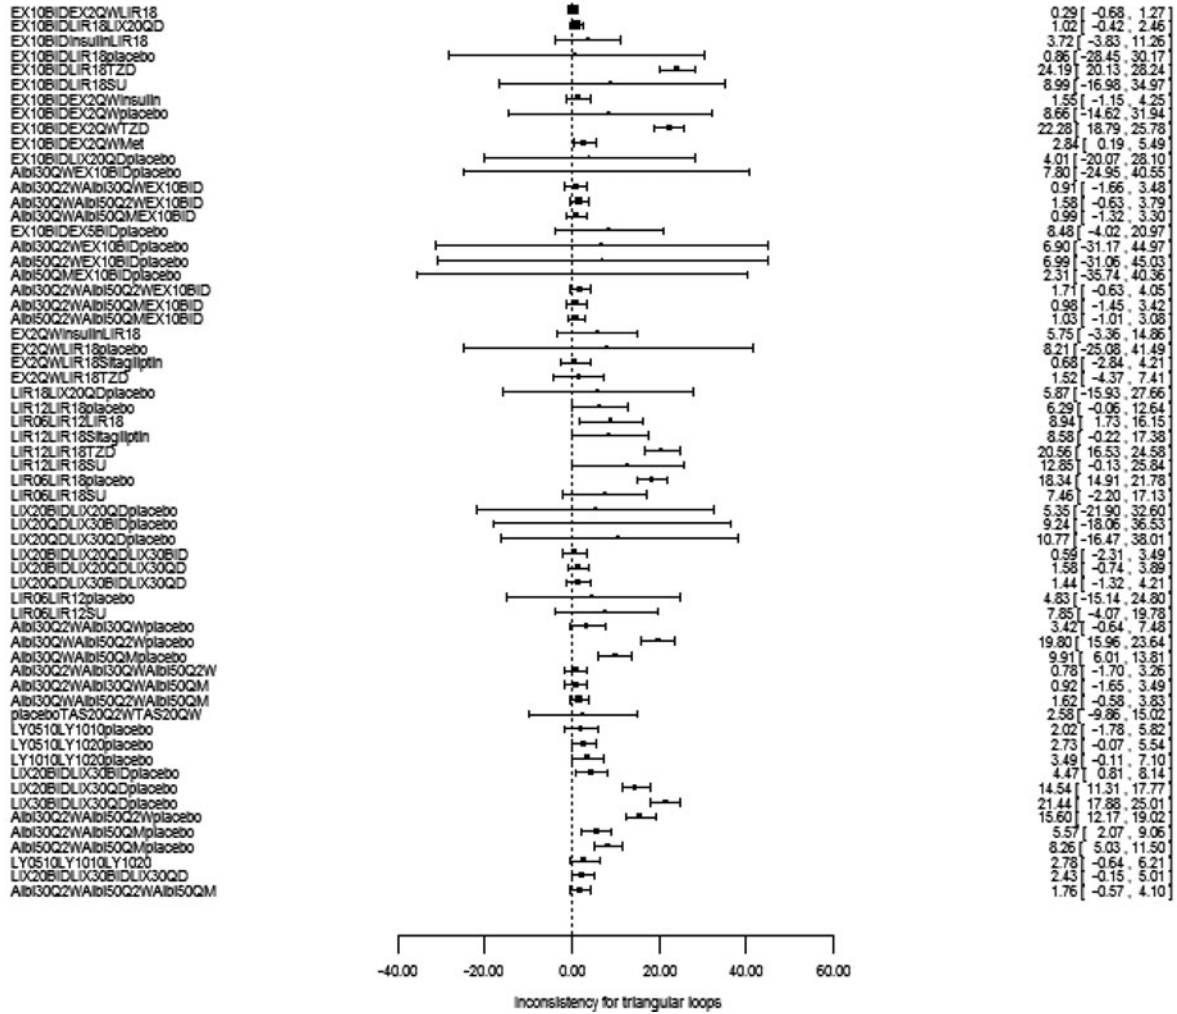

SUPPLEMENTARY FIG. S5. (Continued).

D

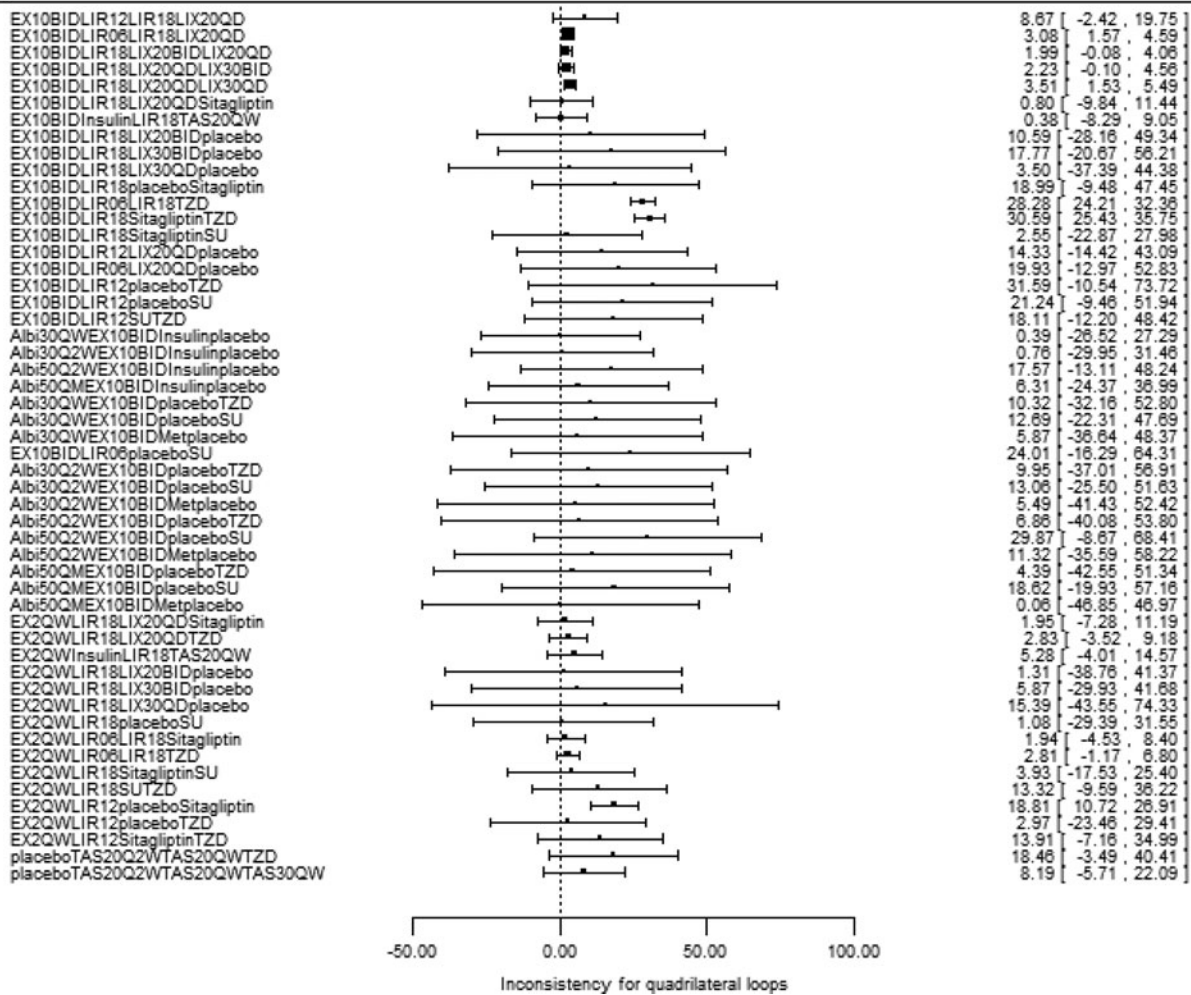

SUPPLEMENTARY FIG. S5. (Continued).

E

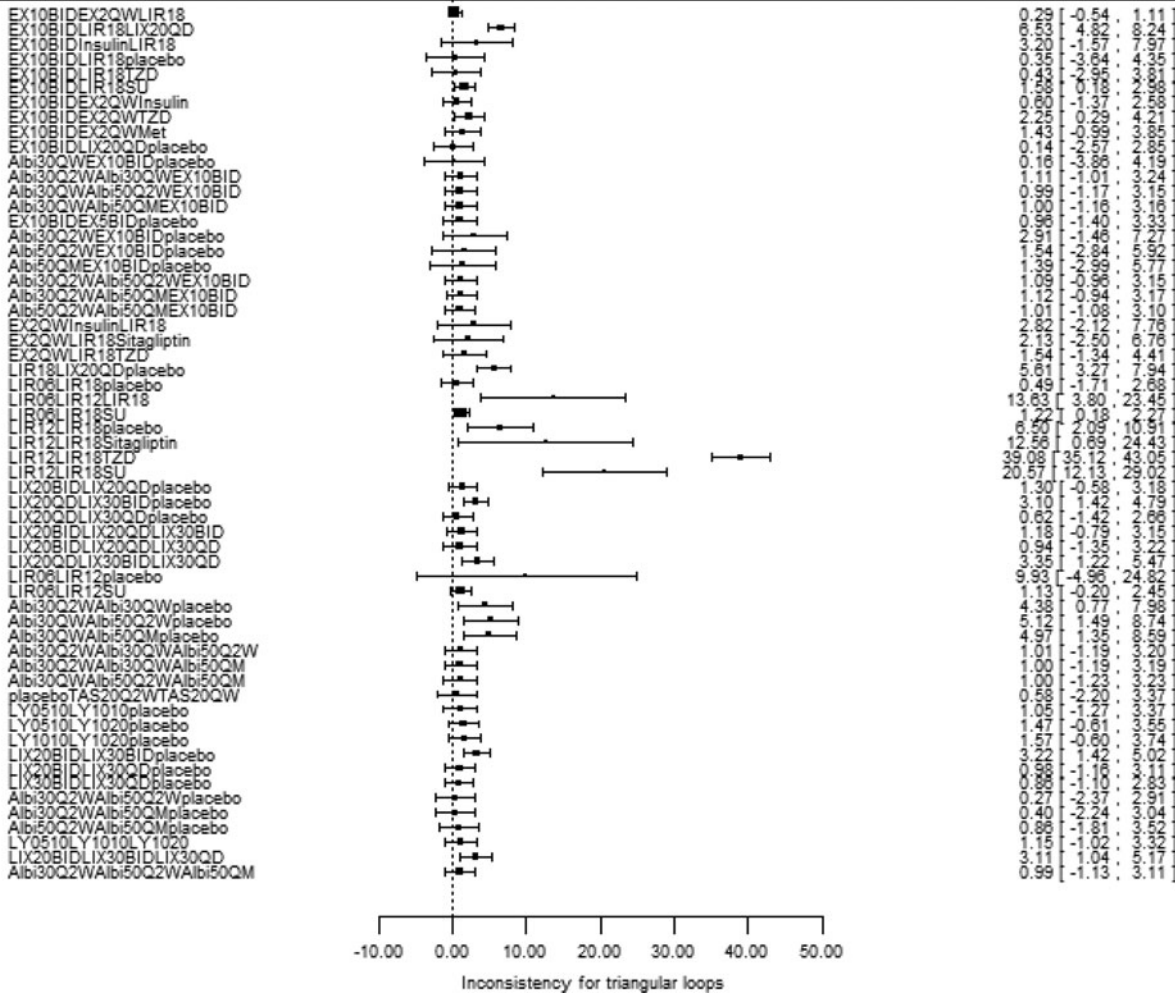

SUPPLEMENTARY FIG. S5. (Continued).

**F**

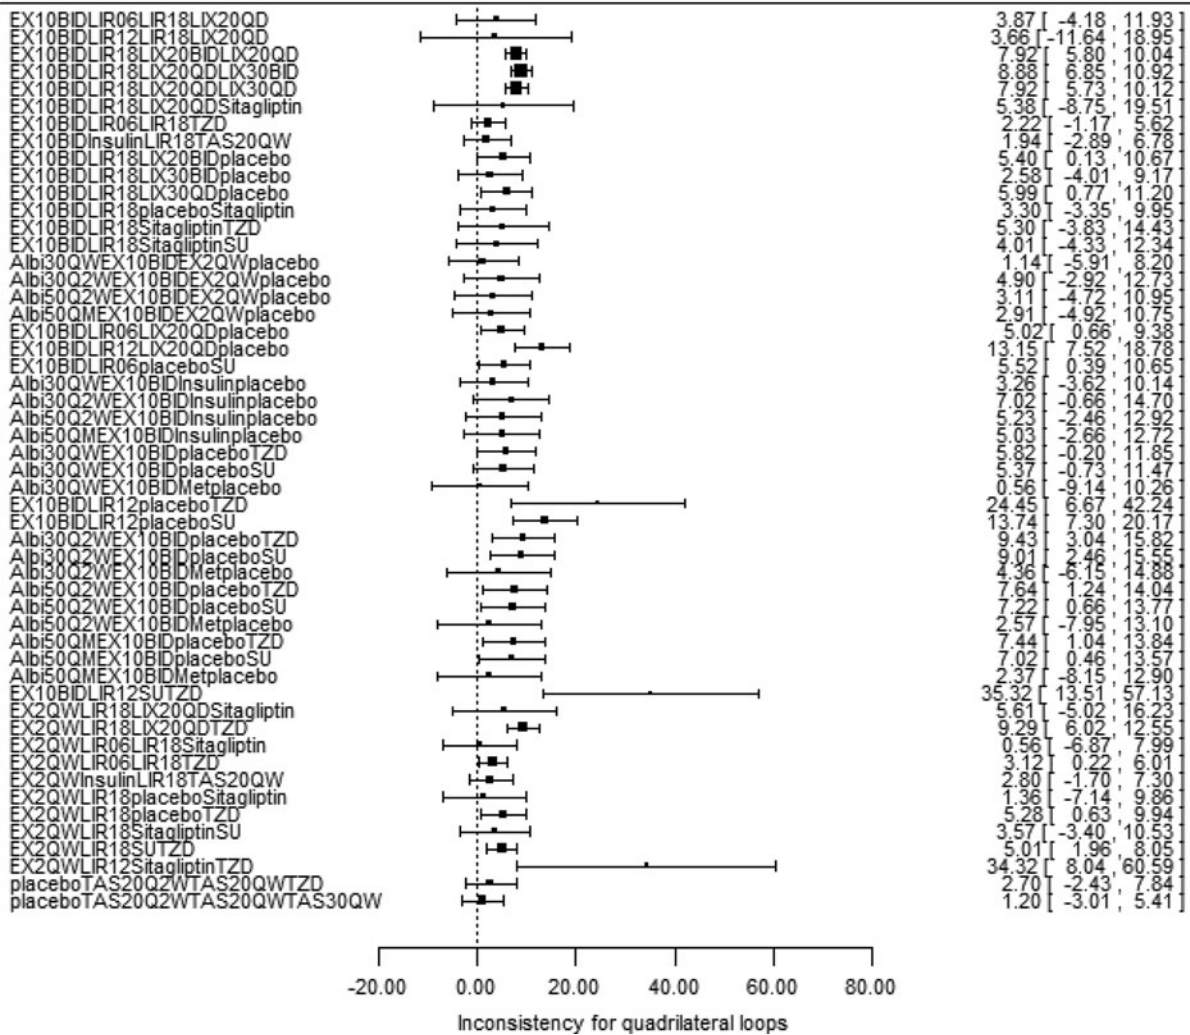

**SUPPLEMENTARY FIG. S5.** Forest plots of inconsistency check about (A) all triangular and (B) all quadrilateral closed loops for nausea, (C) all triangular and (D) all quadrilateral closed loops for vomiting, and (E) all triangular and (F) all quadrilateral closed loops for diarrhea. Albi30QW, albiglutide 30 mg once weekly; Albi50Q2W, albiglutide 50 mg once biweekly; Albi50QM, albiglutide 50 mg once monthly; EX10BID, exenatide 10  $\mu$ g twice daily; EX2QW, exenatide 2 mg once weekly; EX5BID, exenatide 5  $\mu$ g twice daily; LIR06, liraglutide 0.6 mg once daily; LIR12, liraglutide 1.2 mg once daily; LIR18, liraglutide 1.8 mg once daily; LIX20BID, lixisenatide 20  $\mu$ g twice daily; LIX20QD, lixisenatide 20  $\mu$ g once daily; LIX30BID, lixisenatide 30  $\mu$ g twice daily; LIX30QD: lixisenatide 30  $\mu$ g once daily; LY0510: LY2189265 0.5 mg once weekly for 4 weeks, then 1.0 mg once weekly for 12 weeks; LY1010: 1.0 mg once weekly for 16 weeks; LY1020, 1.0 mg once weekly for 4 weeks, then 2.0 mg once weekly for 12 weeks; Met, metformin; SU, sulfonylureas; TAS20Q2W, taspoglutide 20 mg once biweekly; TAS20QW, taspoglutide 20 mg once weekly; TAS30QW, taspoglutide 30 mg once weekly; TZD, thiazolidinedione.
